# Supplementary material
Source: publisher figshare collection journal article supplement (https://gsajournals.figshare.com/articles/dataset/_/11369361)
Supplement: Supplementary file 1 [file 1]

# Northern blot analysis of selected miRNAs in the *cbp80-1* mutant

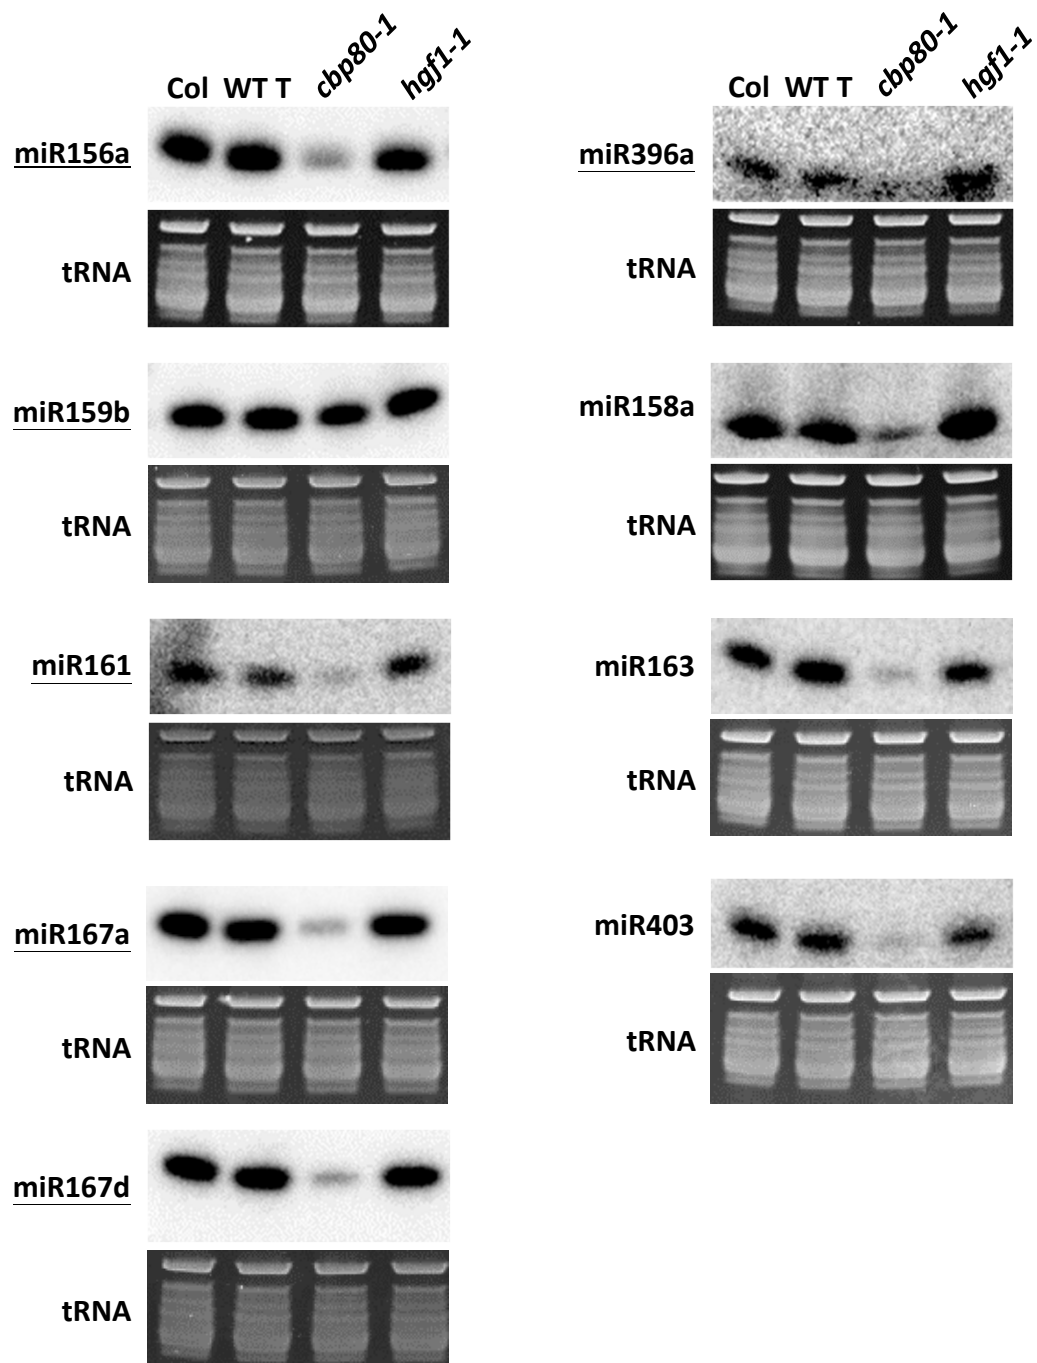

## Figure S6: Northern blot analysis of selected miRNAs in the *cbp80-1* mutant

The DEG analysis of the *cbp80-1* mutant revealed increased accumulation of 53 transcripts corresponding to precursors of miRNAs (pri-miRNAs) (**Table S4**). This increased accumulation was likely the result of defective processing to the cognate mature miRNAs in the *cbp80-1* as indicated by the decreased accumulation of mature miRNAs from 50 out of the 53 elevated pri-miRNAs (**Table S4**; sheet miRNAs). Decreased accumulation of selected miRNAs in the *cbp80-1* mutant was verified by a Northern blot analysis using miRNA-specific probes shown below. The accumulation of these miRNAs did not change from the level in WT T plants or in non-transgenic Col-0 plants in a second mutant retrieved in the same screen as *cbp80-1* (*hgf1-7*, which is impaired in coilin; **Table 1**). These results substantiate an essential role for the wild-type CBP80 protein in processing of a number of pri-miRNAs into mature miRNAs.

### miRNA (miRBase release 21)

ath-miR156a-5p,b-5p,c-5p,d-5p,e,f-5p

ath-miR158a-3p

ath-miR159b-3p

ath-miR161.2

ath-miR163

ath-miR167a-5p,b

ath-miR167d

ath-miR396a-5p

ath-miR403-3p

### probe sequence (5' to 3')

GTGCTCACTCTCTTCTGTCA

TGCTTTGTCTACATTTGGGA

AAGAGCTCCCTTCAATCCAAA

TAGTCACTTTCAATGCATTGA

ATCGAAGTTCCAAGTCCTTCAA

TAGATCATGCTGGCAGCTTCA

CCAGATCATGCTGGCAGCTTCA

CAGTTCAAGAAAGCTGTGGAA

CGAGTTTGTGCGTGAATCTAA
